1 **Epicardial transplantation of autologous atrial appendage micrografts—evaluation of**  
2 **safety and feasibility in pigs after coronary artery occlusion**

3

4 Annu Nummi, MD<sup>1</sup>, Tommi Pätilä, MD PhD<sup>2</sup>, Severi Mulari, MD<sup>1</sup>, Milla Lampinen, PhD<sup>3</sup>,  
5 Tuomo Nieminen, MD PhD<sup>1,4</sup>, Mikko I. Mäyränpää, MD PhD<sup>5</sup>, Antti Vento, MD PhD<sup>1</sup>, Ari  
6 Harjula, MD PhD<sup>1</sup>, Esko Kankuri, MD PhD<sup>3\*</sup> and the AADC consortium \*\*

7

8 \*Corresponding author: Esko Kankuri MD PhD, Faculty of Medicine, Department of  
9 Pharmacology, PO Box 63 (Haartmaninkatu 8), 00014 University of Helsinki, Finland,  
10 [esko.kankuri@helsinki.fi](mailto:esko.kankuri@helsinki.fi), tel. +358-40-7037-338

11

12 \*\* AADC Consortium: Annu Nummi, MD<sup>1</sup>, Tommi Pätilä, MD PhD<sup>2</sup>, Milla Lampinen, PhD<sup>3</sup>,  
13 Tuomo Nieminen, MD PhD<sup>1,4</sup>, Sari Kivistö, MD PhD<sup>6</sup>, Erika Wilkman, MD PhD<sup>7</sup>, Kari  
14 Teittinen, MD<sup>1</sup>, Mika Laine, MD PhD<sup>1</sup>, Markku Kupari, MD PhD<sup>1</sup>, Juha Sinisalo, MD PhD<sup>1</sup>,  
15 Matti Kankainen, PhD<sup>8</sup>, Jari Laurikka, MD PhD<sup>9</sup>, Shengshou Hu, MD PhD<sup>10</sup>, Zhe Zheng, MD  
16 PhD<sup>10</sup>, Xie Yanbo, MD<sup>10</sup>, Eero Mervaala, PhD<sup>3</sup>, Tatu Juvonen, MD PhD<sup>1</sup>, Antti Vento, MD  
17 PhD<sup>1</sup>, Raili Suojaranta, MD PhD<sup>7</sup>, Esko Kankuri, MD PhD<sup>3</sup> and Ari Harjula, Prof<sup>1</sup>

18

19 1 Heart and Lung Center, University of Helsinki and Helsinki University Hospital, Finland  
20 2 Pediatric Cardiac Surgery, Children`s Hospital, University of Helsinki and Helsinki  
21 University Hospital, Finland  
22 3 Faculty of Medicine, Department of Pharmacology, University of Helsinki, Finland  
23 4 Päijät-Häme Joint Authority for Health and Wellbeing, Lahti, Finland  
24 5 Department of Pathology, University of Helsinki and Helsinki University Hospital, Finland

- 25 6 Department of Radiology, University of Helsinki and Helsinki University Hospital, Finland
- 26 7 Department of Anesthesiology and Intensive Care, University of Helsinki and Helsinki  
27 University Hospital, Finland
- 28 8 The Institute for Molecular Medicine Finland (FIMM), University of Helsinki, Finland
- 29 9 Department of Cardiothoracic Surgery, Tampere University Hospital, Finland
- 30 10 National Clinical Research Center of Cardiovascular Diseases, State Key Laboratory of  
31 Cardiovascular Disease, Department of Cardiovascular Surgery, Fuwai Hospital, National  
32 Center for Cardiovascular Diseases, Chinese Academy of Medical Sciences and Peking  
33 Union Medical College, China

34 **Abstract**

35

36 Several approaches devised for clinical utilization of cell-based therapies for heart failure often  
37 suffer from complex and lengthy preparation stages. Epicardial delivery of autologous atrial  
38 appendage micrografts (AAMs) with a clinically used extracellular matrix (ECM) patch  
39 provides a straightforward therapy alternative. We evaluated the operative feasibility and the  
40 effect of micrografts on the patch-induced epicardial foreign body inflammatory response in a  
41 porcine model of myocardial infarction. Right atrial appendages were harvested and  
42 mechanically processed into AAMs. The left anterior descending coronary artery was ligated  
43 to generate acute infarction. Patches of ECM matrix with or without AAMs were transplanted  
44 epicardially onto the infarcted area. Four pigs received the ECM and four received the AAMs  
45 patch. Cardiac function was studied by echocardiography both preoperatively and at three  
46 weeks follow-up. The primary outcome measures were safety and feasibility of the therapy  
47 administration and the secondary outcome was the inflammatory response to ECM. Neither  
48 AAMs nor ECM patch-related complications were detected during the follow-up time. AAMs  
49 patch preparation was feasible according to time and safety. Inflammation was greatly reduced  
50 in AAMs as compared to ECM patches as measured by the amount of infiltrated inflammatory  
51 cells and area of inflammation. Immunohistochemistry demonstrated an increased CD3+ cell  
52 density in the AAMs patch infiltrate. Epicardial AAMs transplantation demonstrated safety and  
53 clinical feasibility. The use of micrografts significantly inhibited ECM-induced foreign body  
54 inflammatory reactivity. Transplantation of AAMs shows good clinical applicability as  
55 adjuvant therapy to cardiac surgery and can suppress acute inflammatory reactivity.

56

57 Keywords: autologous atrial appendage micrografts, myocardial infarction, epicardial  
58 transplantation, cell therapy

## 59 **Introduction**

60 Myocardial infarction (MI) is the major cause of death worldwide [1]. It bears a poor  
61 prognosis particularly when accompanied with ischemic heart failure. Revascularization and  
62 medical therapy are critical for severe ischemic heart failure but the recovery of the irreversibly  
63 damaged infarction area is poor or nonexistent. Cell therapy has been proposed as an additional  
64 strategy to the current treatment modalities for heart failure: one with potential to restore or  
65 even regenerate structure and function of the infarcted area. Several studies have suggested  
66 benefit from cell therapies, but therapy preparation suffers from complex and lengthy protocols,  
67 and the treatment requires additional interventions. Cell therapies exert their benefit largely  
68 through secretion of soluble paracrine factors. [2, 3] These protective factors activate pathways  
69 in the target tissue that result in the repair and remodeling of infarcted myocardium. [4, 5] As  
70 adjuvant to cardiac surgery, cell therapy holds potential to reduce mortality and re-  
71 hospitalization caused by heart failure during long term follow-up, improve global left  
72 ventricular ejection fraction (LVEF), New York Heart Association (NYHA) -functional class  
73 and quality of life as well as to lower poor prognosis-associated high NT-proBNP levels. [6] In  
74 our earlier studies the use of injected bone marrow mononuclear cells during coronary artery  
75 bypass (CABG) surgery showed significant reduction of myocardial infarction scar [7, 8],  
76 which is a major prognostic factor for survival in ischemic heart failure [9, 10].

77 Atrial appendage offers a good tissue-matched reservoir for various cell types, including  
78 progenitor cells, contributing to paracrine healing. [11-13] Moreover, it is thought that stem or  
79 progenitor cells of cardiac origin are more likely to differentiate into cardiac lineages [14] and  
80 may thus contribute to the atrial appendages' effect on the failing myocardium. Autologous  
81 cells can minimize rejection and thus ensure better cell engraftment. The extracellular matrix  
82 and the microtissue architecture of the micrografts can support cellular adherence and survival

83 of transplanted cells. [15] Moreover, the mixture of different myocardial cell types can enable  
84 better interplay and therapeutic effect via enhanced survival and improved paracrine signaling.  
85 [16, 17]

86 The effect of any cell therapy is critically dependent on the delivery method. [18] Animal  
87 models have proven the epicardial delivery route to be beneficial in securing generous cell  
88 engraftment when compared to various types of cell delivery routes by intramyocardial  
89 injection or coronary infusion. [19, 20] In principle, the technique of delivering progenitor cells  
90 epicardially causes minimal harm to the functional myocardium, less arrhythmogenicity [21]  
91 and ensures sufficient amount of cells to remain at the transplant area [18].

92 We have encouraging results on the transplantation of epicardial atrial appendage  
93 micrografts (AAMs) in ischemic heart failure in rodents [22] and from a clinical safety and  
94 feasibility trial in patients during CABG surgery [23]. This study was established to test the  
95 critical technical questions regarding the procedure and ensure the general safety. Specific focus  
96 was on the technical details of preparing the transplant (including sterility and time  
97 schedule/delay for preparing the transplant during open heart surgery). Additionally, we  
98 evaluated the effect of the micrografts on the foreign body reaction and inflammation caused  
99 by one of the clinically used pericardial patch extracellular matrix (ECM) sheets in this pig  
100 model.

101

## 102 **Materials and methods**

103 All procedures on laboratory animals and animal care were approved by the Division of  
104 Health and Social Services, Legality and Licensing of the Regional State Administrative  
105 Agency for Southern Finland (ESAVI/1482/04.10.07/2015). The study protocol was approved  
106 by the Surgical Ethics Committee of the Hospital District of Helsinki and Uusimaa (number  
107 180/13/03/02/13).

108 The study included eight pigs. Four animals received an ECM patch and four animals an  
109 ECM patch with AAMs. The procedure and follow-up were done similarly to all animals.

110 A standard anterior sternotomy was performed under anesthesia. First echocardiography  
111 (echo) was done prior to any changes in cardiac function. Then the right atrial appendage (RAA)  
112 was ligated using a purse string suture. RAA was removed from all animals in both groups.  
113 For the animals in the AAMs patch group, the harvested RAA was processed mechanically on-  
114 site in the operating room using a tissue homogenizer (Rigenera-system, HBW s.r.l., Turin,  
115 Italy) [24]. This system utilizes a sterile, single-use tissue homogenizer surface to generate the  
116 micrografts and yields approximately 5–10 millions of viable cells per gram of RAA tissue.

117 Myocardial infarction was introduced by ligating the left anterior descending coronary  
118 artery (LAD) with a non-absorbable suture (**Fig 1**). Optimal location for ligation was chosen in  
119 the B-part of the LAD so that the biggest diagonal artery remained untouched and open to secure  
120 adequate blood flow to the anterior wall of the left ventricle (LV). This was to make sure that  
121 the infarction was large enough to cause observable heart failure but the risk for fatal ventricular  
122 arrhythmias was controlled. The acute infarction was verified with reduced motion of the  
123 inferior wall, accelerated heart rhythm and the local changes in myocardial color.

124

125 **Figure 1. Completed patch at the area of infarct.**

126 Completed autologous atrial appendage micrograft (AAM) patch secured to myocardium with  
127 three sutures and ligation of left descending coronary artery causing heart infarct and failure  
128 (marked with black arrow).

129

130

131 The isolated AAMs were applied in standard cardioplegia suspension on the myocardium  
132 using the epicardial transplantation technique. We used an extracellular matrix sheet  
133 (Cormatrix® ECMTM Technology, Cormatrix Cardiovascular Inc., Atlanta, GA, USA) where  
134 the suspension of AAMs were applied using fibrin sealant (Tisseel™, Baxter Healthcare Corp.  
135 Westlake Village, CA, USA). Approximately two hours after producing the infarct and careful  
136 follow up of arrhythmias, the Cormatrix® with the cell suspension was secured to the  
137 myocardial surface by three to four simple knots using non-absorbable suture. The detailed  
138 preparation of the cell sheet has been explained in our previous publication. [25]

139 Echo was performed by a single cardiologist. This was done under anesthesia and on open  
140 heart to achieve adequate vision. Echo was performed twice each animal; in the beginning of  
141 the first operation, prior to the atrial appendectomy and infarction, and at three weeks follow  
142 up when the animals were first put under anesthesia and later euthanized. Echo was done to  
143 measure the dimensions of the anterior wall of LV, to determine the changes in LVEF and to  
144 observe any changes in the cardiac function.

145 After the operation animals received painkillers (buprenorphine 0,3mg x2-3 and  
146 carprofen 50 mg x1-2) for three days. At the three weeks` time point each animal was  
147 euthanized and samples from the infarction area with the patch was taken for histological  
148 analysis.

149 Hematoxylin-eosin (HE) staining and immunohistochemistry for CD45, CD3, and CD20



150 were performed and the plates were scanned by Genome Biology Unit (Biomedicum,  
151 University of Helsinki, Helsinki, Finland). Digital images were analyzed using Panoramic  
152 Viewer (3DHISTECH Ltd, Budapest, Hungary) and MIPAR™ image analysis software  
153 (Worthington, OH, USA) was used for cell counting. Distance from Cormatrix® inner surface  
154 to epicardium was measured at ten points from the distant corners of the patch in both groups.  
155 At the same distances, squared image samples of 1 mm<sup>2</sup> were taken and MIPAR™ was used to  
156 calculate number of nuclei and their relative distances in both groups.

157 The primary antibodies were rabbit anti-CD3 IgG (SP7 monoclonal, Spring Bioscience  
158 M3072, Abcam, Cambridge, UK), rabbit anti-CD20 IgG (polyclonal, Thermo Fisher Scientific  
159 Labvision RB9013P, Waltham, MA, USA), rabbit anti-CD45 IgG (clone #145 monoclonal  
160 recombinant, Sino Biological 100342-R145, Beijing, China). All antibodies were diluted using  
161 the antibody diluent (BiositeHisto, Nordic Biosite, Tampere, Finland, cat. no BCB-QUG2XK).  
162 Secondary antibody was an HRP-polymer anti-rabbit antibody (BiositeHisto Nordic Biosite cat.  
163 no KDB-Z47C3W). Immunoreactivity of antibodies was controlled in sections of porcine  
164 kidney, spleen and liver using human tonsilla as positive control.

165 Immunohistochemistry was performed using the LabVision Autostainer 480 (Thermo  
166 Fisher Scientific) and heat-induced epitope retrieval for 20min at 98°C, followed by wash  
167 (TBS-TWEEN pH8,4), incubation with primary antibody (30min, RT), wash, detection  
168 polymer incubation (30min, RT), endogenous peroxidase blocking (10 min, H<sub>2</sub>O<sub>2</sub>), washx2,  
169 DAB (High Contrast DAB, BiositeHisto Nordic Biosite cat. no BCB-R7IKBJ, 10min, RT),  
170 wash, 0,5% CuSO<sub>4</sub>-enhancement (10min), wash, 1:10 Mayer's hemalum solution (Merck  
171 KGaA, Darmstadt, Germany, 2min), bluing with running tap water (7min), and finally followed  
172 by dehydration-clearing. Mounting of coverslips was carried out with xylene-based mounting  
173 medium.

174 Slides were digitalized as WSI in Mirax format with 3DHistech Panoramic MIDI  
175 scanner (Budapest, Hungary) at a pixel size of  $0.23\mu\text{m}\times 0.23\mu\text{m}$ . The scanner utilizes a  
176 brightfield microscope setup with an HV\_F22CL camera (Hitachi Kokusai Electric America  
177 Ltd, Southwick, MA, USA) equipped with a plan-*a*po 20x objective. For immunostaining  
178 analysis, serial non overlapping images covering the Cormatrix area from every sample were  
179 captured with the Panoramic Viewer software (3DHISTEC Ltd). Image area was then  
180 standardized as  $\text{mm}^2$ . The analysis of the captured images was carried out using the FiJI ImageJ  
181 software. [26] The image analysis macros are available upon request from the corresponding  
182 author. Briefly, for each image, after background subtraction, the color deconvolution algorithm  
183 to hematoxylin (H) and diaminobenzidine (DAB) channels was utilized. The DAB channel  
184 image was thresholded to the stain using the automated default method based on the IsoData  
185 algorithm, and the stain intensity was measured. For nuclear counting, hematoxylin-positive  
186 nuclei (representing the total amount of nuclei in the image) were counted from the H-channel  
187 using the particle-counting algorithm and compared with the thresholded positively immune-  
188 stained nuclei counted from the DAB channel. The results of the densitometric image analysis  
189 of the serial images for each sample were first averaged, and these single values were then used  
190 for the further combined analysis of results. The image analysis macros are available from the  
191 authors by request.

192 The primary outcome measures were safety in terms of hemodynamic adverse effects  
193 (ventricular arrhythmias and death) and feasibility of the therapy administration in a clinical  
194 setting. Feasibility was evaluated by the success in completing the delivery of the cell sheet to  
195 the infarction area in myocardium and in success in closing the right RAA without any  
196 additional suturing. Additional outcome measures were changes in LV wall thickness and in  
197 LVEF measured by echo, any problems related to recovery such as infection, lack of normal

198 growth, eating or exercise and the inflammatory response to ECM.

199       The groups were compared, and analyses were performed with SPSS software version  
200 16. 0 (Chicago, IL, USA). Two-tailed t-test for independent samples was used to compare the  
201 groups. Differences were considered significant at  $P < 0.05$ . Unless otherwise specified, data in  
202 the manuscript are presented as mean  $\pm$  SD.

## 203 **Results**

204 Ten pigs were operated in total. Two pigs died at the table due to ventricular fibrillation  
205 after the LAD ligation. Eight survivors went through the whole study protocol of three weeks.  
206 All of them recovered the operation well, without observable changes in normal physical  
207 activity or growth. One animal of the control group had a local abscess beneath the sternal  
208 wound while reopening the sternum at the three weeks' time point. Abscess was located below  
209 xiphoid process and was not in contact with the heart or the transplant. There was no further  
210 evidence of mediastinitis or sternal infection. This animal was physically in good health without  
211 any disturbances in appetite or growth. Other animals showed no signs of wound or other  
212 infections.

### 213 *Feasibility*

214 All eight infarct survivors received the patch successfully. During the observation time  
215 of two hours after the ligation, patch was ready to be placed in all cases. There was no bleeding  
216 in appendages and no additional patching or suturing was needed. The chosen minimum size  
217 for the removable appendage tissue was 5x10 mm, and the weights ranged 610-830 mg.

### 218 *Echocardiography*

219 For all pigs, the echo LVEFs evaluated at baseline prior to surgery were normal (LVEF  
220 was 70% in all animals). There were no anatomical abnormalities or congenital deficiencies.  
221 Each animal's postoperative echo showed hypokinetic area at three weeks after surgery, but  
222 there were no differences in follow-up LVEFs between the groups (AAMs patch group EF  
223 63.3%±9.4%, range 50%–70%; ECM patch group EF 62.5%±4.3%, range 60%–70%, p  
224 =0.915).

225 The mean LV wall thickness (measured at the infarction area) showed no differences  
226 between the groups (at baseline AAMs patch group 6.9mm±0.6mm, range 5.6mm–7.3mm;

227 ECM patch group  $6.7\text{mm}\pm 0.7\text{ mm}$ , range  $5.7\text{mm}\text{--}7.4\text{mm}$ ,  $p = 0.731$  and at follow-up AAMs  
228 patch group  $7.0\text{mm}\pm 1.8\text{mm}$ , range  $4.6\text{mm}\text{--}8.9\text{mm}$ ; ECM patch group  $6.8\text{mm}\pm 0.4\text{mm}$ , range  
229  $6.4\text{mm}\text{--}7.4\text{mm}$ ,  $p = 0.881$ ). Thickening of the LV wall during the follow-up was similar  
230 between the groups (AAMs patch group  $0.3\text{mm}\pm 1.7\text{mm}$ , range  $-2.1\text{mm}\text{--}1.7\text{mm}$ ; ECM patch  
231 group  $0.1\text{mm}\pm 0.6\text{mm}$ , range  $-0.85\text{mm}\text{--}0.7\text{mm}$ ,  $p = 0.889$ ). One animal from the AAMs patch  
232 group had severe bleeding during re-sternotomy and the possibility to provide a comparable  
233 echo was lost.

### 234 *Histology*

235 HE-staining showed infiltration of inflammatory cells and foreign body reaction, in all  
236 animals. This reaction was significantly less in hearts with AAMs, when compared to the ECM  
237 hearts (**Fig 2**). The average distance between the Cormatrix® and epicardium was significantly  
238 shorter in the AAMs patch group (AAMs patch group  $1,463\mu\text{m}\pm 441\mu\text{m}$ , range  $659\mu\text{m}\text{--}$   
239  $2,523\mu\text{m}$ ; ECM patch group  $2,457\mu\text{m}\pm 865\mu\text{m}$ , range  $1,599\mu\text{m}\text{--}4,729\mu\text{m}$ ,  $p = 0.001$ ) and the  
240 number of inflammatory cell nuclei was significantly less in the AAMs patch group (AAMs  
241 patch group  $6682/\text{mm}^2\pm 2,475/\text{mm}^2$ , range  $3,046/\text{mm}^2\text{--}11,609/\text{mm}^2$ ; ECM patch group  
242  $8,736/\text{mm}^2\pm 2,798/\text{mm}^2$ , range  $5,137\text{--}13,506/\text{mm}^2$ ,  $p = 0.026$ ) (Figure 2). In the ECM patch  
243 group, nuclei were clustered, whereas in the AAMs patch group, more diffuse pattern of the  
244 nuclei was observed (**Fig 2**). In both groups, similarly, the inflammation was evident by  
245 migration of giant cell macrophages, neutrophils and lymphocytes as characterized by HE-  
246 staining. Also, there were plenty of capillary vessels along the foreign body reaction without  
247 difference between the groups. The inflammation area in all hearts was limited to the area of  
248 cell graft or control graft transplant and the endocardial area showed no inflammation. The  
249 fibrotic changes due the infarct were relatively small and mainly seen at the endocardial part of  
250 the LV wall. The size of the infarction was variable in both groups and all animals. Only a few

251 samples (from three animals) showed larger infarct with granulation tissue and small  
252 calcification and necrotic areas with no difference between the groups.

253

254 **Figure 2. Comparison of inflammatory reaction by hematoxylin eosin staining.**

255 Hematoxylin eosin staining from the area of the ECM patch (marked with single arrow) and  
256 myocardium. **A.** Figure shows average distance from the ECM patch to epicardium (average  
257 of 10 measurements). A representative distance measurement shown with double red arrow.

258 Autologous atrial appendiceal micrograft (AAM) containing samples were significantly  
259 thinner than samples without AAMs. Scalebar 1 mm. **B.** Figure showing cell count from the  
260 foreign body reaction caused by the patch. Inflammation was more cell dense in control  
261 samples whereas the AAM group showed more diffusely scattered nuclei at the supra-  
262 epicardial area. The cell nuclei per 1 mm<sup>2</sup> count was performed twice from each sample.

263 Scalebar 200 μm.

264

265 Results from immunohistochemistry analysis of the inflammatory infiltrate are presented  
266 in **Table 1**. CD3<sup>+</sup> cell density, representing the T-lymphocyte density, was greater in AAMs  
267 patch group (AAMs patch group 4,834/mm<sup>2</sup>±1,271/mm<sup>2</sup>, range 3,028/mm<sup>2</sup>–7,131/mm<sup>2</sup>; ECM  
268 patch group 3,364/mm<sup>2</sup>±667/mm<sup>2</sup>, range 2,336/mm<sup>2</sup>–5,346/mm<sup>2</sup>, p < 0.001) (**Fig 3**). Moreover,  
269 mean intensity was stronger in the AAM patch group in CD3 staining (AAMs patch group  
270 126/mm<sup>2</sup>±12/mm<sup>2</sup>, range 107/mm<sup>2</sup>–146/mm<sup>2</sup>; ECM patch group 114/mm<sup>2</sup>±9. 8/mm<sup>2</sup>, range  
271 87/mm<sup>2</sup>–124/mm<sup>2</sup>, p=0.007). The density of CD45<sup>+</sup> cells, representing total lymphocyte  
272 density, was not significantly different between groups (AAMs patch group  
273 6,376/mm<sup>2</sup>±1,990/mm<sup>2</sup>, range 4,009/mm<sup>2</sup>–14,748/mm<sup>2</sup>; ECM patch group  
274 5,467/mm<sup>2</sup>±1,579/mm<sup>2</sup>, range 3,159/mm<sup>2</sup>–9,925/mm<sup>2</sup>, p = 0.078) (**Fig 4**). Mean intensity in

275 CD45 staining did not reach statistical difference between groups. There were no differences in  
276 the CD20<sup>+</sup> cell densities between groups (Fig 5).

| <b>CD3</b>                               | <b>Cell</b>                | <b>Cormatrix</b>          |
|------------------------------------------|----------------------------|---------------------------|
| Positively stained cells/mm <sup>2</sup> | 4,838±1,271 (3,028–7,131)  | 3,364±667 (2,336–5,346)   |
| Mean staining intensity                  | 126±12 (107–146)           | 114±9.8 (87–124)          |
| Stained area/total area (%)              | 26±6.0 (15–34)             | 21±7.0 (7.9–32)           |
| <b>CD45</b>                              |                            |                           |
| Positively stained cells/mm <sup>2</sup> | 6,376±1,990 (4,009–14,748) | 5,467±1,579 (3,159–9,925) |
| Mean staining intensity                  | 140±21 (109–192)           | 129±13 (110–151)          |
| Stained area/total area (%)              | 42±4.5 (34–50)             | 42±7.4 (25–54)            |
| <b>CD20</b>                              |                            |                           |
| Positively stained cells/mm <sup>2</sup> | 700±277 (346–1,069)        | 682±389 (238–1,552)       |
| Mean staining intensity                  | 137±9.7 (124–152)          | 146±29 (91–198)           |
| Stained area/total area (%)              | 17±5.4 (6.9–24)            | 15±7.9 (3.9–33)           |

277 **Table 1. Results and comparison of nuclei from immunohistochemistry stainings.** CD3  
278 staining is representative of the T-lymphocyte population, CD45 of the overall lymphocyte  
279 population, and CD20 of the B-lymphocyte population.

280

281 **Figure 3. Representative immunohistochemistry images for T-lymphocytes (CD3+) from**  
282 **the AAMs patch group (left panels) and ECM patch group (right panels).**

283

284 **Figure 4. Representative immunohistochemistry images for leukocytes (CD45+) from**  
285 **the AAMs patch group (left panels) and ECM patch group (right panels).**

286

287 **Figure 5. Representative immunohistochemistry images for B-cells (CD20+) from the**  
288 **AAMs patch group (left panels) and ECM patch group (right panels).**

## 290 **Discussion**

291       The specific aim of this study was to evaluate the safety and feasibility of epicardial  
292 delivery of AAMs in pigs after myocardial infarction. We found that epicardial transplantation  
293 was both feasible and safe using this large animal model.

294       Ventricular fibrillation occurred in two out of ten pigs (20%). These arrhythmias occurred  
295 immediately after ligation of the LAD and caused death of both animals. The reported mortality  
296 rates in porcine models of infarction are usually high, 33% [27] due to the susceptibility of pigs  
297 developing fatal arrhythmias after coronary occlusion. The infarction in our study was therefore  
298 not too large to cause death but adequate to cause local changes and clearly observable acute  
299 ischemia.

300       All eight pigs receiving therapy recovered well and survived the three-week follow-up.  
301 Even though the hypokinetic area in the inferior and anterior wall of LV was seen in echo, the  
302 infarction changes seen in histology were not constantly observable in every section. In one  
303 histological plate cross section of the left descending artery was seen re-opened for blood flow  
304 due to the collateral connections. The natural capacity of these adolescent pigs to recover was  
305 most likely the reason for only little permanent damage caused by the infarction. [28]

306       In all samples, an active foreign body reaction was detected with leukocytes including  
307 macrophages, eosinophils and lymphocytes. There was, however, a significant difference in the  
308 amount of inflammation among the two groups. The number of inflammatory cell nuclei in the  
309 AAMs patch group samples was significantly less as measured by counting the number of  
310 nuclei and the area foreign body reaction when compared to the ECM patch group. The cells  
311 and micrografts inside the transplant were clearly protecting against the foreign body reaction.  
312 This may be explained by the paracrine effect of transplanted cells. Transplanted cells release  
313 protective factors and signals that have been proven to be the main reason for environmental



314 tissue repair and remodeling. These signals (including cytokines, chemokines, growth factors,  
315 microparticles) activate pathways which consecutively improve blood perfusion, tissue repair  
316 and remodeling and inhibit hypertrophy and fibrosis. [29-31] One of the most crucial factors in  
317 cell signaling and stem cell derived communication with myocardium is exosome, nanometer-  
318 sized vesicle. Exosomes have been proved to increase cell proliferation, reduce infarct size and  
319 increase EF in animal studies. [32, 33] In addition these cardio-protective secreted  
320 microparticles that induce paracrine and autocrine phenomenon have also been thought to  
321 inhibit unwanted inflammation [3-5] via, for example, activation of macrophages, cell apoptosis  
322 and increase in metabolism [3, 5]. This protective force against inflammation that transplanted  
323 cells possess may be the reason why the inflammation reaction was decreased when micrografts  
324 were used compared with the ECM sheet alone.

325 Cormatrix®, decellularized porcine small intestine submucosa, is clinically used as a  
326 scaffold to support tissue regrowth in vascular structures. This extracellular matrix is gradually  
327 replaced, leaving behind functional tissue. Several studies have shown that Cormatrix® elicits  
328 inflammatory reactions [34-36] as also clearly seen in our study. Inflammation is histologically  
329 seen mainly in eosinophilic infiltrates often with granulation tissue, fibrosis [36] and foreign  
330 body giant cell reaction [37]. Therefore, knowing the inflammatory response that Cormatrix®  
331 causes, especially in porcine, the strength of foreign body reaction compared to the use of  
332 AAMs and ECM matrix alone was the most important finding and the main focus in histologic  
333 evaluation. The use of AAMs seemed to inhibit the inflammatory effect of Cormatrix® and  
334 therefore result in a more satisfying environment.

335 It has been proven that the use of biological material alone may have a beneficial effect  
336 to the infarcted myocardium. This is possible due to the fact, that the material placed on  
337 myocardium seems to thicken the wall, reduce wall stress and eventually prevent the negative

338 LV remodeling. [38] This was also seen in our study. There were no differences in LV wall  
339 measures or LVEF between the two groups. The infarcted wall was performing equally well  
340 whether the micrografts were or were not used with the supportive matrix.

341 Our results demonstrate that atrial micrografts can modulate and suppress the immune  
342 response, as mimicked here by the foreign body response to biomaterial, by shifting the CD45+  
343 leukocyte balance towards a more CD3+ T-cell-populated one. These results have important  
344 implications for the treatment of acute inflammatory reactions, for example acute myocardial  
345 infarctions, with atrial appendage micrografts. Our results provide the first insight into the  
346 regulation of the inflammatory and immune responses by atrial appendage micrografts. Further  
347 investigations should be targeted towards the identification of leukocyte polarization and  
348 especially the anti-inflammatory subtype analysis of leukocytes and T-cells. Moreover, these  
349 experiments should utilize various inductors of inflammation and immune responses.

350

## 351 **Conclusions**

352 In conclusion, ECM sheet provides substantial inflammatory response to adjacent tissues,  
353 while myocardium stays intact in this response. Additional delivery of AAMs attenuates the  
354 inherent inflammatory response, while keeping the regenerative potential as effective,  
355 providing a clinically feasible additive for the goal to repair the infarcted myocardium.  
356 Transplantation of AAMs with ECM shows good clinical applicability as adjuvant therapy to  
357 cardiac surgery and may serve as a potential delivery platform for future cell or gene-based  
358 cardiac therapies.

359

360

361           **References**

- 362           1. GBD 2015 Mortality and Causes of Death Collaborators. Global, regional, and national  
363           life expectancy, all-cause mortality, and cause-specific mortality for 249 causes of death,  
364           1980-2015: a systematic analysis for the Global Burden of Disease Study 2015. *Lancet*.  
365           2016;388:1459–1544.
- 366           2. Nguyen PK, Rhee JW, Wu JC. Adult Stem Cell Therapy and Heart Failure, 2000 to 2016:  
367           A Systematic Review. *JAMA Cardiol*. 2016;1:831–841.
- 368           3. Gneocchi M, Zhang Z, Ni A, Dzau VJ. Paracrine mechanisms in adult stem cell signaling  
369           and therapy. *Circ Res*. 2008;103:1204–1219.
- 370           4. Gneocchi M, He H, Liang OD, Melo LG, Morello F, Mu H, et al. Paracrine action  
371           accounts for marked protection of ischemic heart by Akt-modified mesenchymal stem  
372           cells. *Nat Med*. 2005;11:367–368.
- 373           5. Stempien-Otero A, Helterline D, Plummer T, Farris S, Prouse A, Polissar N, et al.  
374           Mechanisms of bone marrow-derived cell therapy in ischemic cardiomyopathy with left  
375           ventricular assist device bridge to transplant. *J Am Coll Cardiol*. 2015;65:1424–1434.
- 376           6. Fisher SA, Doree C, Mathur A, Martin-Rendon E. Meta-analysis of cell therapy trials  
377           for patient with heart failure. *Circ Res*. 2015;116:1361–1377.
- 378           7. Pätälä T, Lehtinen M, Vento A, Schildt J, Sinisalo J, Laine M, et al. Autologous bone  
379           marrow mononuclear cell transplantation in ischemic heart failure: a prospective,  
380           controlled, randomized, double-blind study of cell transplantation combined with  
381           coronary bypass. *J Heart Lung Transplant*. 2014;33:567–574.
- 382           8. Lehtinen M, Pätälä T, Vento A, Kankuri E, Suojaranta-Ylinen R, Pöyhiä R, et al.  
383           Prospective, randomized, double-blinded trial of bone marrow cell transplantation

- 384 combined with coronary surgery-perioperative safety study. *Interact Cardiovasc Thorac*  
385 *Surg.* 2014;19:990–996.
- 386 9. Wu KC, Zerhouni EA, Judd RM, Lugo-Olivieri CH, Barouch LA, Schulman SP, et al.  
387 Prognostic significance of microvascular obstruction by magnetic resonance imaging in  
388 patients with acute myocardial infarction. *Circulation.* 1998;97:765–772.
- 389 10. Kelle S, Roes SD, Klein C, Kokocinski T, de Roos A, Fleck E, et al. Prognostic Value  
390 of Myocardial Infarct Size and Contractile Reserve Using Magnetic Resonance Imaging.  
391 *J Am Coll Cardiol.* 2009;54:1770–1777.
- 392 11. Koninckx R, Daniels A, Windmolders S, Mees U, Macianskiene R, Mubagwa K, et al.  
393 The cardiac atrial appendage stem cell: a new and promising candidate for myocardial  
394 repair. *Cardiovasc Res.* 2013;97:413–423.
- 395 12. Itzhaki-Alfia A, Leor J, Raanani E, Sternik L, Spiegelstein D, Netser S, et al. Patient  
396 characteristics and cell source determine the number of isolated human cardiac  
397 progenitor cells. *Circulation.* 2009;120:2559–2566.
- 398 13. Mishra R, Vijayan K, Colletti EJ, Harrington DA, Matthiesen TS, Simpson D, et al.  
399 Characterization and functionality of cardiac progenitor cells in congenital heart patients.  
400 *Circulation.* 2011;123:364–373.
- 401 14. Garcia AN, Sanz-Ruiz R, Santos MAF, Fernández-Avilès F. “Second-generation” stem  
402 cells for cardiac repair. *World J Stem Cells.* 2015;7:352–367.
- 403 15. Steinhauser ML, Lee RT. Regeneration of the heart. *EMBO Mol Med.* 2011;3:701–712.
- 404 16. Lampinen M, Vento A, Laurikka J, Nystedt J, Mervaala E, Harjula A, et al. Rational  
405 Autologous Cell Sources For Therapy of Heart Failure - Vehicles and Targets For Gene  
406 and RNA Therapies. *Curr Gene Ther.* 2016;16:21–33.

- 407 17. Dobaczewski M, Gonzales-Quesada C, Frangogiannis NG. The Extracellular matrix as  
408 a modulator of the inflammatory and reparative response following myocardial  
409 infarction. *J Moll Cell Cardiol.* 2010;48:504–511.
- 410 18. Fukushima S, Sawa Y, Suzuki K. Choice of cell-delivery route for successful cell  
411 transplantation therapy for the heart. *Future Cardiol.* 2013;9:215–227.
- 412 19. Fisher SA, Brunskill SJ, Doree C, Mathur A, Taggart DP, Martin-Rendon E. Stem cell  
413 therapy for chronic ischaemic heart disease and congestive heart failure. *Cochrane*  
414 *Database Syst Rev.* 2014; 4:CD007888.
- 415 20. Wen Y, Meng L, Xie J, Ouyang J. Direct autologous bone marrow-derived stem cell  
416 transplantation for ischemic heart disease: a meta-analysis. *Expert Opin Biol Ther.*  
417 2011;11:559–567.
- 418 21. Pätälä T, Miyagawa S, Imanishi Y, Fukushima S, Siltanen A, Mervaala E, et al.  
419 Comparison of arrhythmogenicity and proinflammatory activity induced by  
420 intramyocardial or epicardial myoblast sheet delivery in a rat model of ischemic heart  
421 failure. *PLoS One.* 2015;10:e0123963.
- 422 22. Yanbo X, Lampinen M, Takala J, Sikorski V, Soliymani R, Tarkia M, et al. Epicardial  
423 therapy with atrial appendage micrografts salvages myocardium after infarction. *J Heart*  
424 *Lung Transplant.* 2020; 39:707–718.
- 425 23. Nummi A, Nieminen T, Pätälä T, Lampinen M, Lehtinen ML, Kivistö S, et al. Epicardial  
426 delivery of autologous atrial appendage micrografts during coronary artery bypass  
427 surgery—safety and feasibility study. *Pilot Feasibility Stud.* 2017;3:74.
- 428 24. Trovato L, Monti M, Del Fante C, Cervio M, Lampinen M, Ambrosio L, et al. A new  
429 medical device rigeneracons allows to obtain viable micro-grafts from mechanical  
430 disaggregation of human tissues. *J Cell Physiol.* 2015;230:2299–2303.

- 431 25. Lampinen M, Nummi A, Nieminen T, Harjula A, Kankuri E. Intraoperative processing  
432 and epicardial transplantation of autologous atrial tissue for cardiac repair. *J Heart Lung*  
433 *Transplant.* 2017; 36:1020–1022.
- 434 26. Schindeli, J, Arganda-Carreras I, Frise, E. Kaynig V, Longair M, Pietzsch T, et al. Fiji:  
435 an open-source platform for biological-image analysis. *Nat Methods.* 2012;9:676–682.
- 436 27. Kraitchman DL, Bluemke DA, Chin BB, Heldman AW, Heldman AW. A minimally  
437 invasive method for creating coronary stenosis in a swine model for MRI and SPECT  
438 imaging. *Invest Radiol.* 2000;35:445–451.
- 439 28. Pätälä T, Ikonen T, Kankuri E, Ahonen A, Krogerus L, Lauerma K, et al. Spontaneous  
440 recovery of myocardial function after ligation of Ameroid-stenosed coronary artery.  
441 *Scand Cardiovasc J.* 2009;43:408–416.
- 442 29. Tang XL, Rokosh G, Sanganalmath SK, Yuan F, Sato H, Mu J, et al. Intracoronary  
443 administration of cardiac progenitor cells alleviates left ventricular dysfunction in rats  
444 with a 30-day-old infarction. *Circulation.* 2010;121:293–305.
- 445 30. Farahmand P, Lai TY, Weisel RD, Fazel S, Yau T, Menasche P, et al. Skeletal myoblasts  
446 preserve remote matrix architecture and global function when implanted early or late  
447 after coronary ligation into infarcted or remote myocardium. *Circulation.* 2008;118:130–  
448 137.
- 449 31. Mathieu M, Bartunek J, El Oumeiri B, Touihri K, Hadad I, Thoma P, et al. Cell therapy  
450 with autologous bone marrow mononuclear stem cells is associated with superior cardiac  
451 recovery compared with use of nonmodified mesenchymal stem cells in a canine model  
452 of chronic myocardial infarction. *J Thorac Cardiovasc Surg.* 2009; 138:646–653.

- 453 32. Lai RC, Arslan F, Lee MM, Sze NS, Choo A, Chen TS, et al. Exosome secreted by MSC  
454 reduces myocardial ischemia/reperfusion injury. *Stem Cell Res.* 2010;4:214–222.
- 455 33. Arslan F, Lai RC, Smeets MB, Akeroyd L, Choo A, Agnor EN, et al. Mesenchymal stem  
456 cell-derived exosomes increase ATP levels, decrease oxidative stress and activate  
457 PI3K/Akt pathway to enhance myocardial viability and prevent adverse remodeling after  
458 myocardial ischemia/reperfusion injury. *Stem Cell Res.* 2013;10:301–312.
- 459 34. Zaidi AH, Nathan M, Emani S, Baird C, del Nido PJ, Gauvreau K, et al. Preliminary  
460 experience with porcine intestinal submucosa (CorMatrix) for valve reconstruction in  
461 congenital heart disease: histologic evaluation of explanted valves. *J Thorac Cardiovasc*  
462 *Surg.* 2014;148:2216–4, 2225e1.
- 463 35. Wells WJ. Responsible innovation. *J Thorac Cardiovasc Surg.* 2014;148:2225–2226.
- 464 36. Rosario-Quinones F, Magid MS, Yau J, Pawale A, Nguyen K. Tissue reaction to porcine  
465 intestinal submucosa (CorMatrix) implants in pediatric cardiac patients: a single-center  
466 experience. *Ann Thorac Surg.* 2015;99:1373–1377.
- 467 37. Nelson JS, Heider A, Si M-S, Ohye RG. Evaluation of Explanted CorMatrix Intracardiac  
468 Patches in Children With Congenital Heart Disease Presented at the Fifty-second. *Ann*  
469 *Thor Surg.* 2016;102:1329–1335.
- 470 38. Radisic M, Christman KL. Materials science and tissue engineering: repairing the heart.  
471 *Mayo Clin Proc.* 2013;88:884–898.

472

### 473 **Acknowledgements**

474 Research nurses Liisa Blubaum, Anna Blubaum and Mariitta Salmi are gratefully  
475 acknowledged and thanked for their professional expertise in the development of the protocol.

476 Technicians Olli Valtanen and Veikko Huusko are gratefully acknowledged and thanked for  
477 their help and professional contribution in animal laboratory.



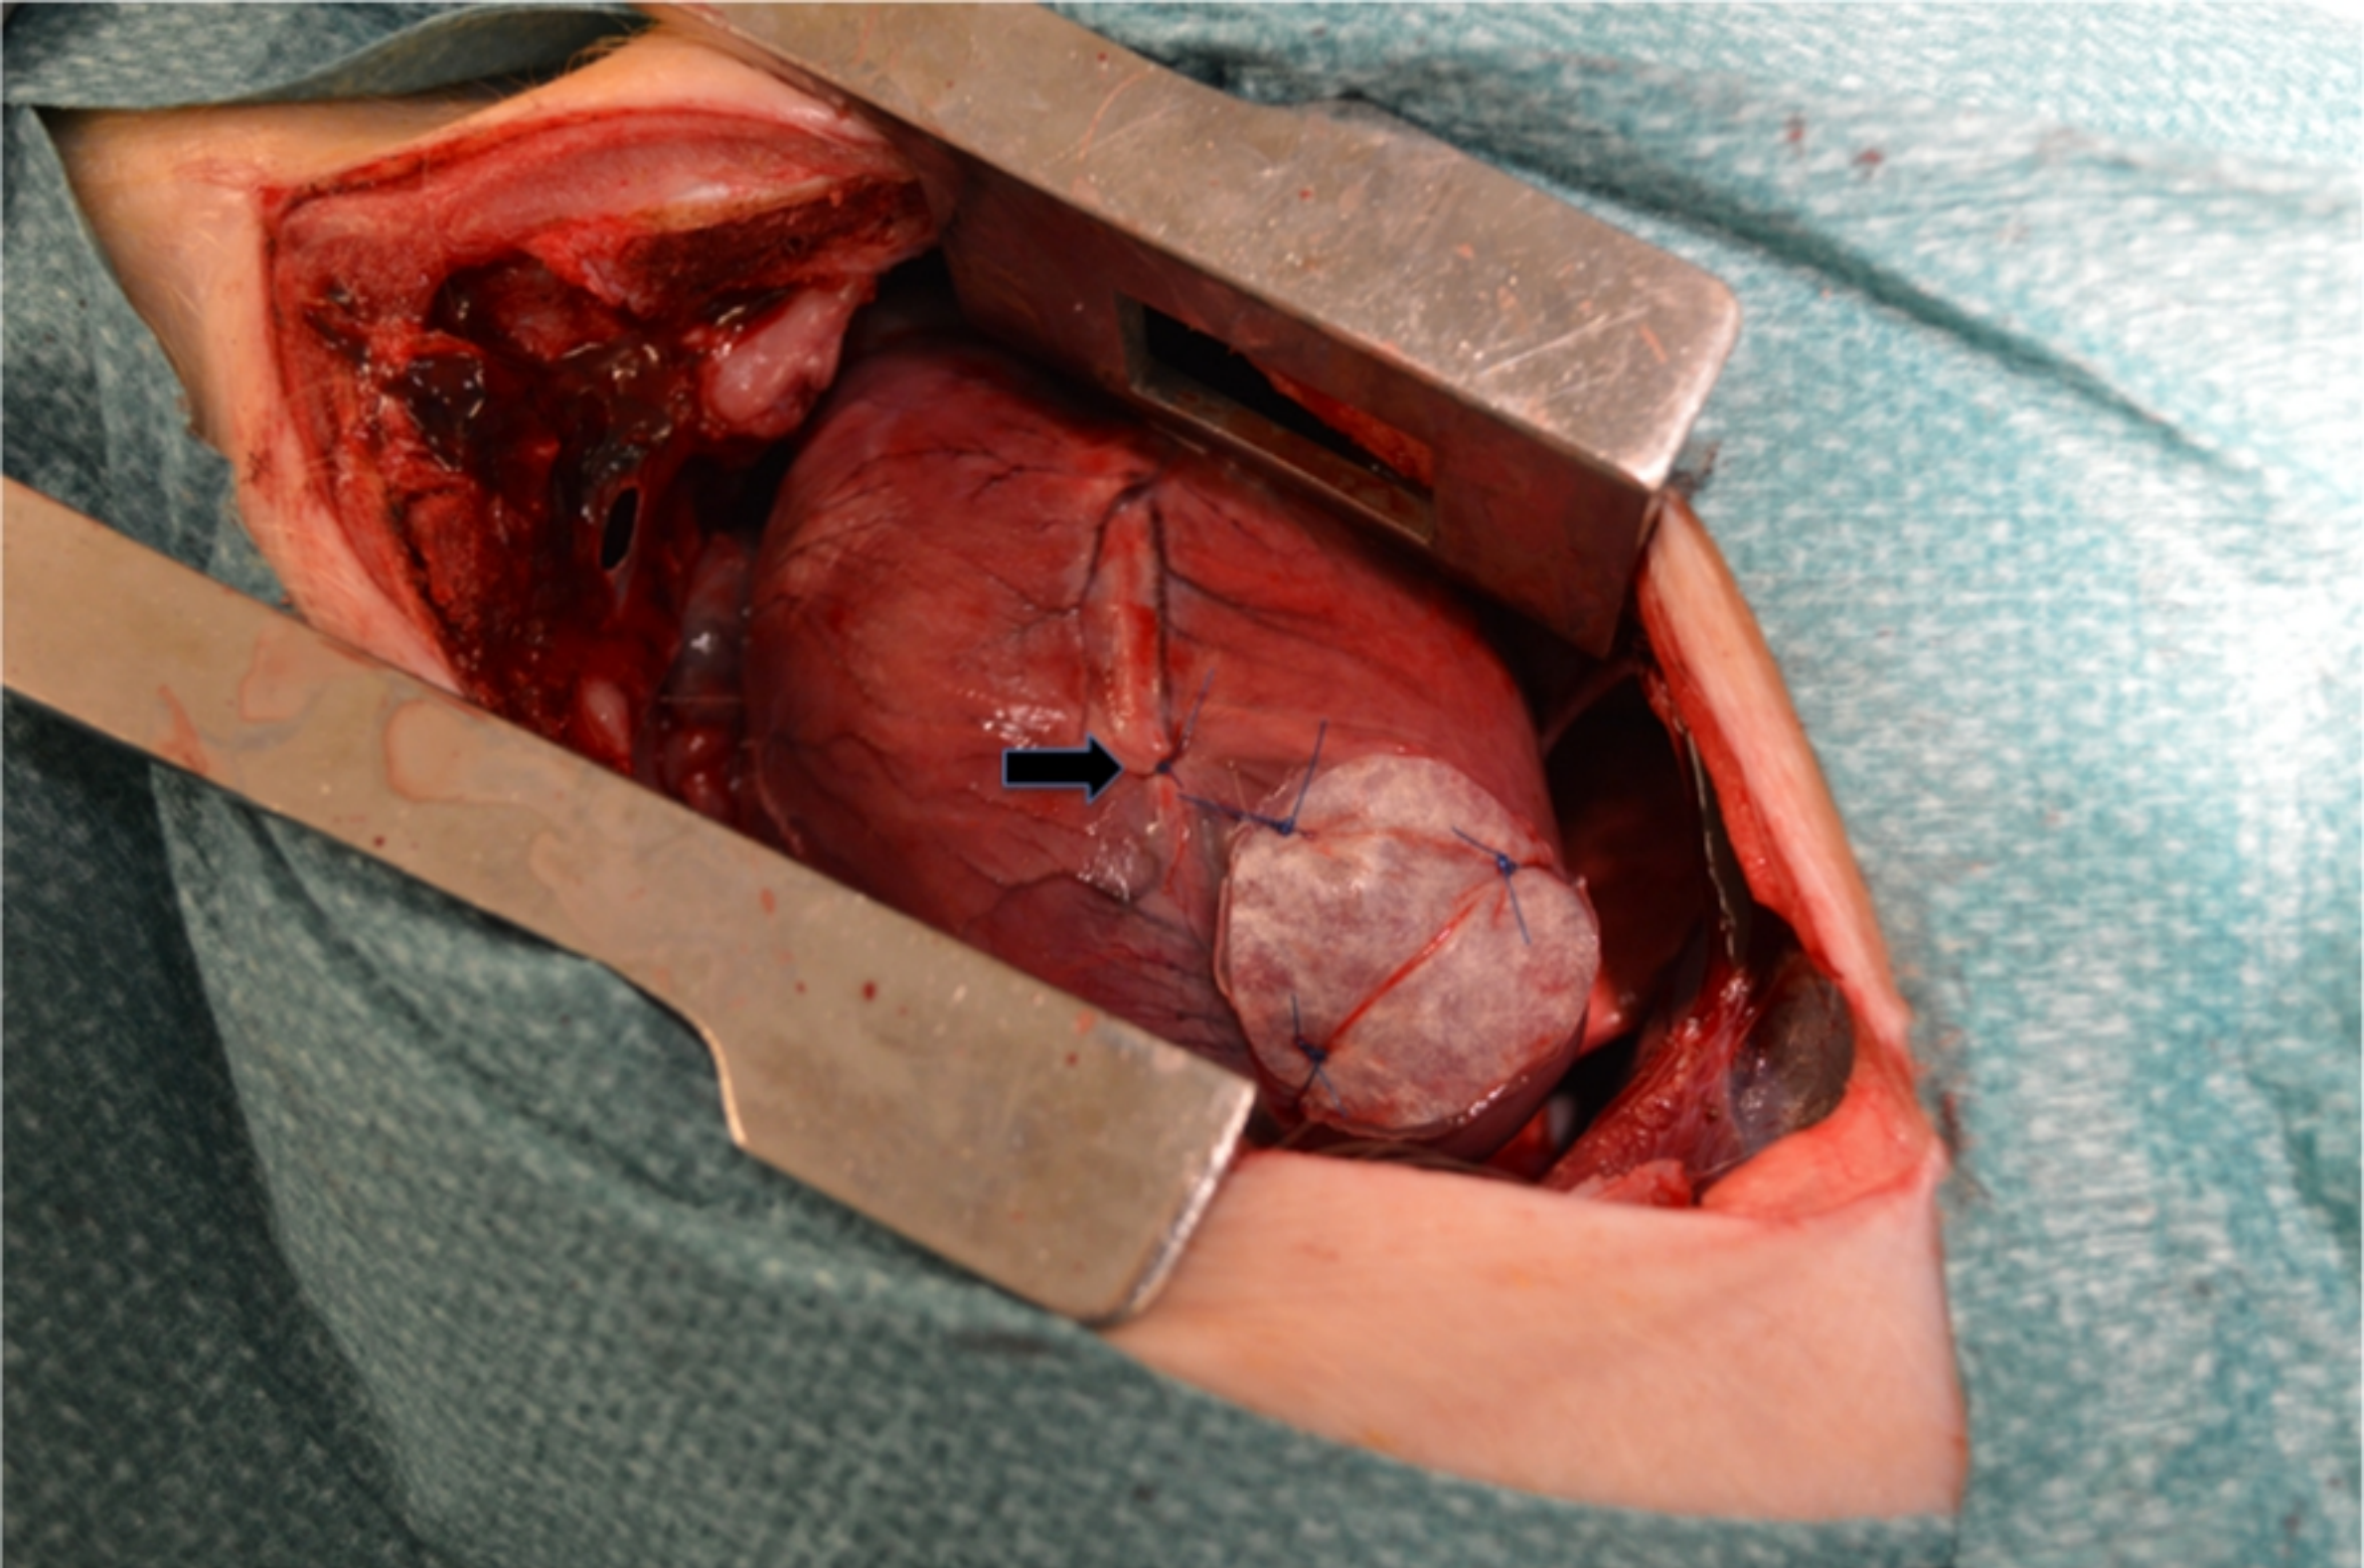

Figure 1

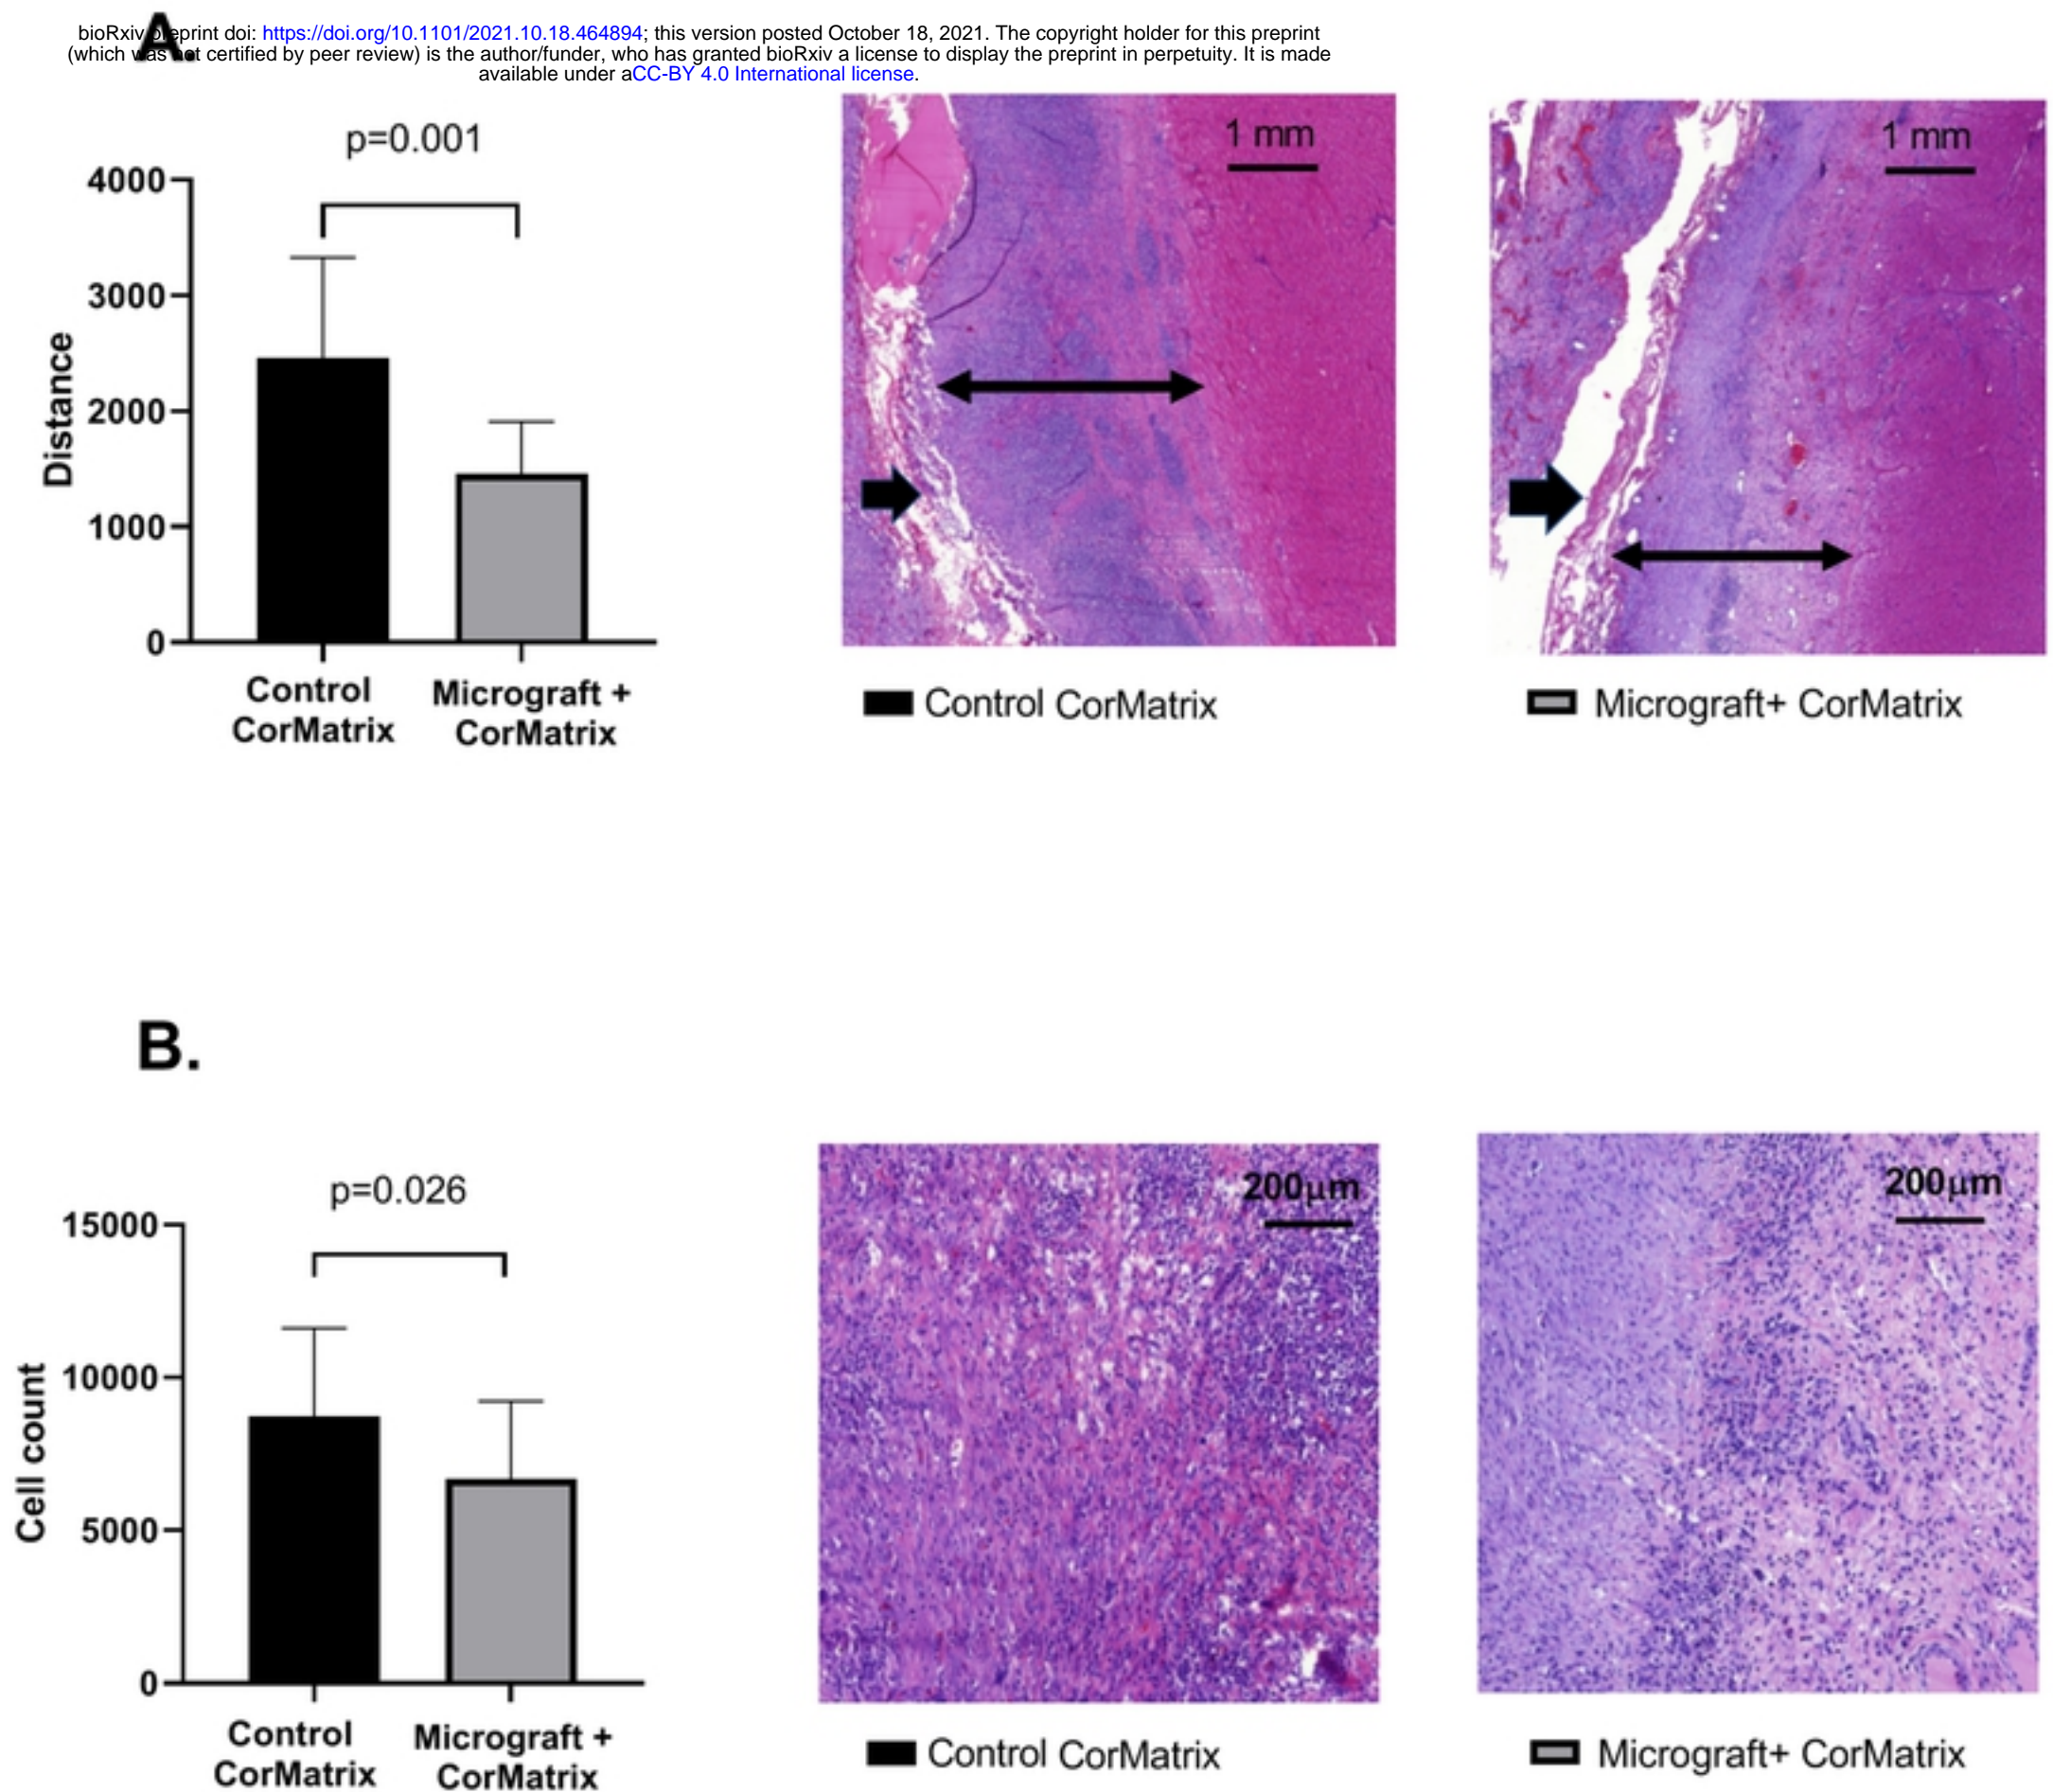

Figure 2

# CD3

10x

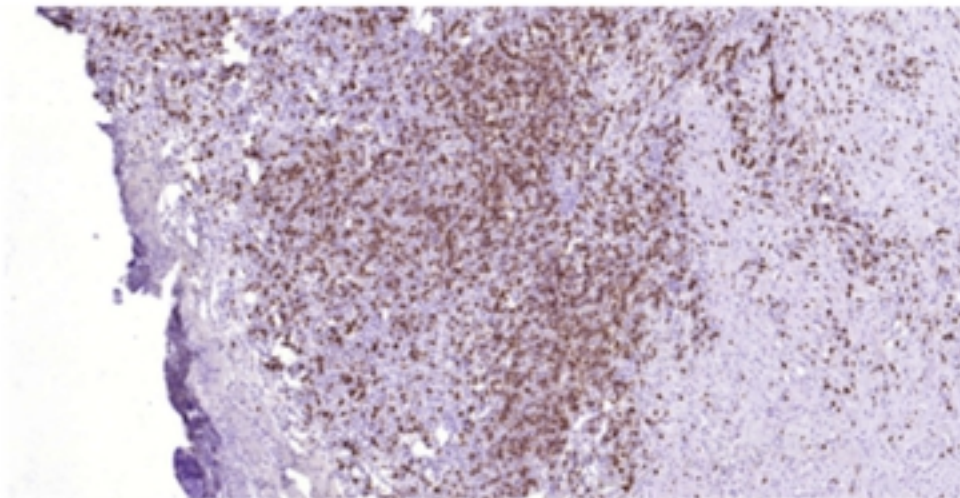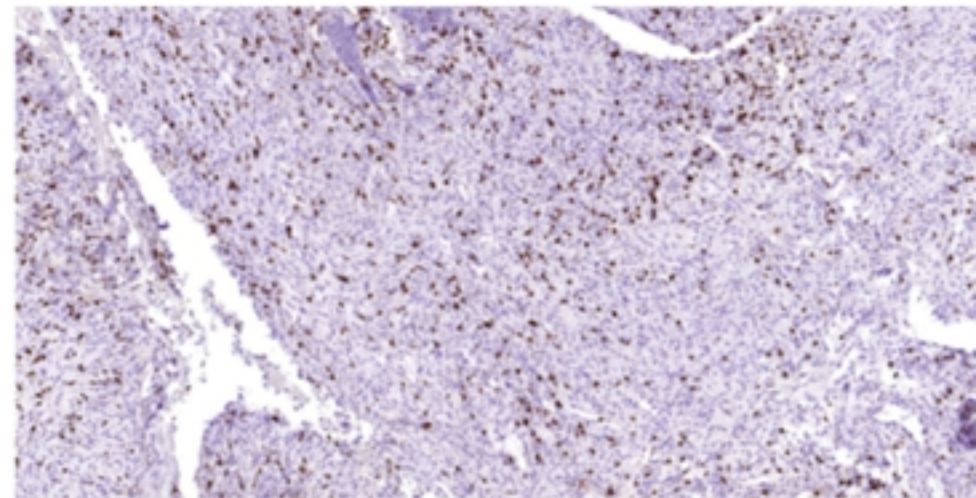

40x

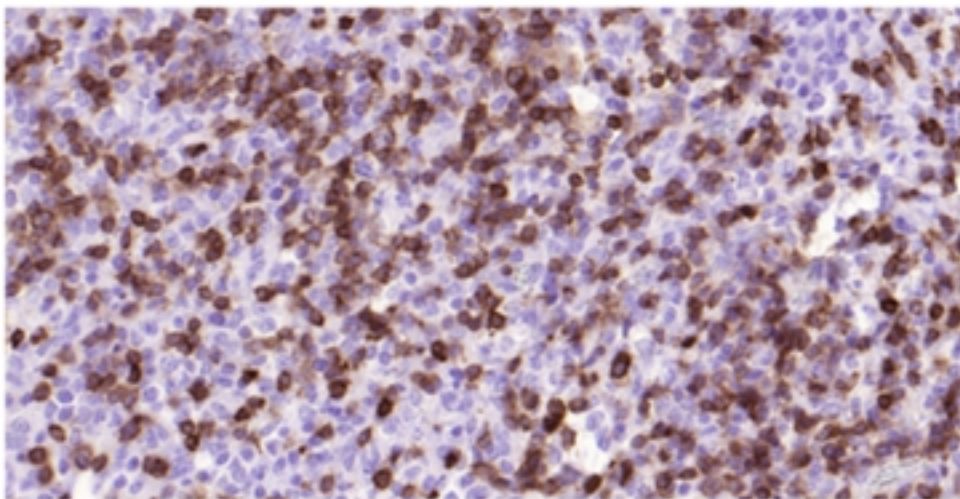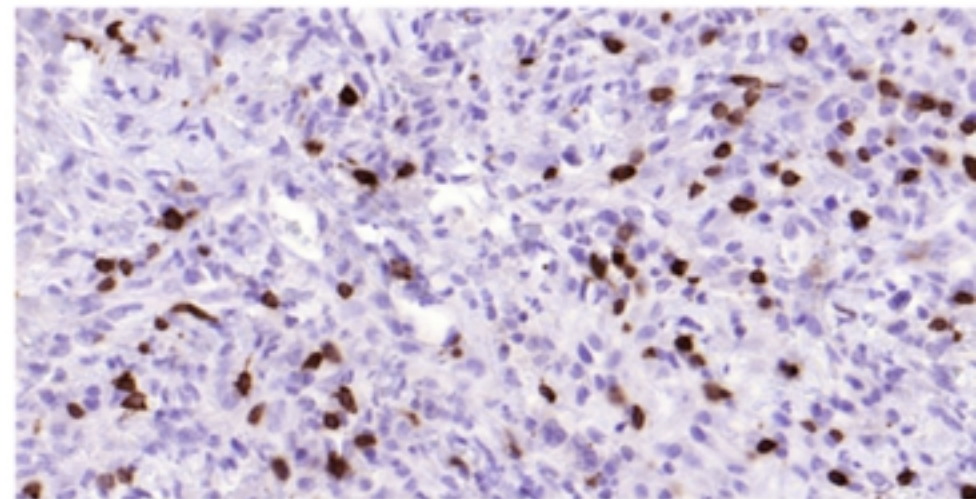

Cell

Cormatrix

Figure 3

# CD45

10x

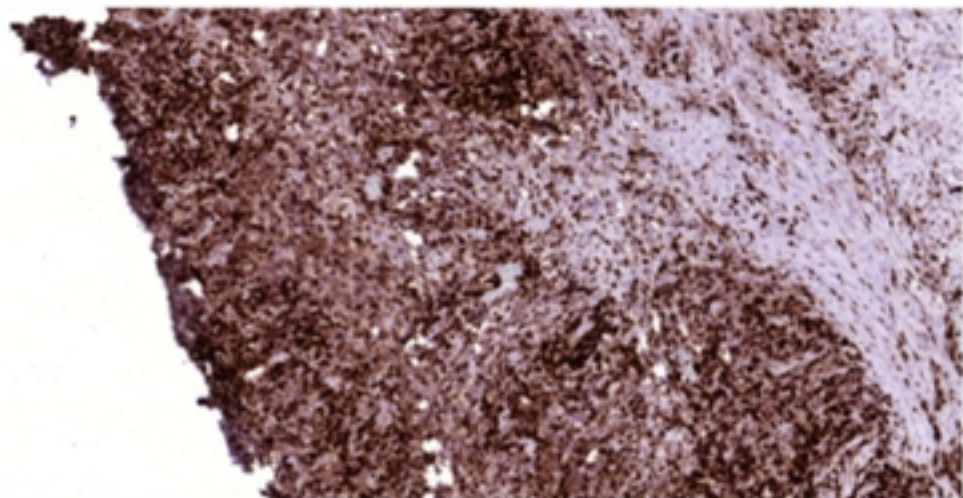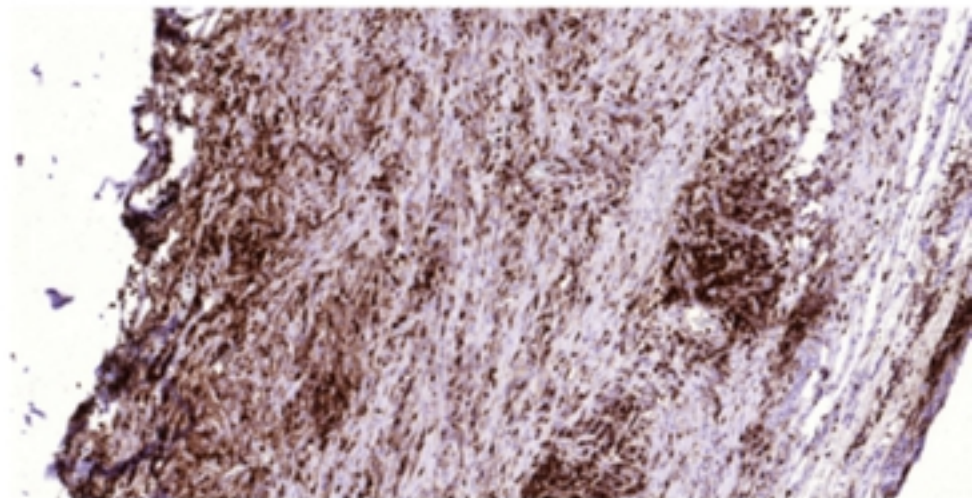

40x

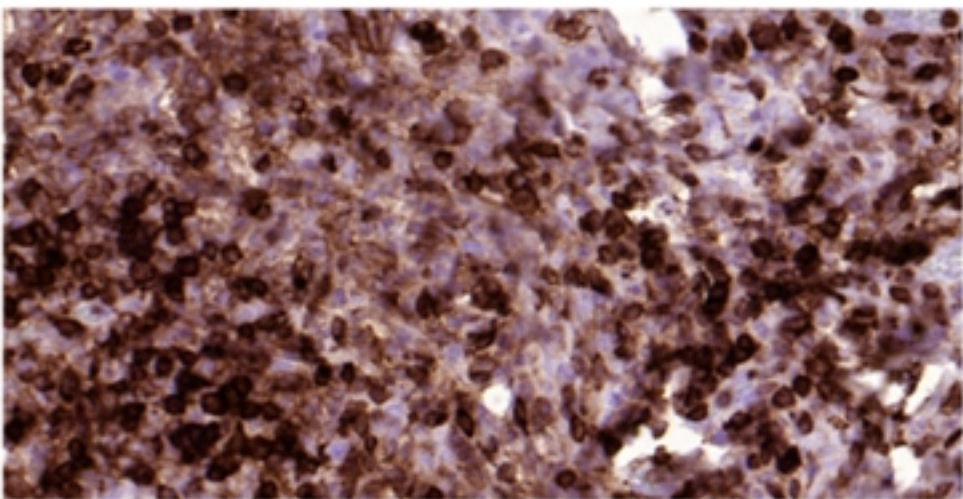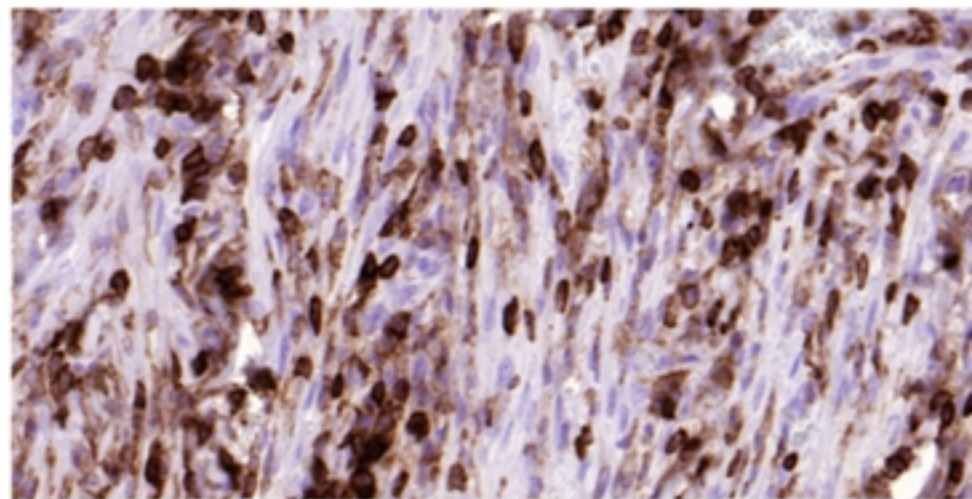

Cell

Cormatrix

Figure 4

# CD20

10x

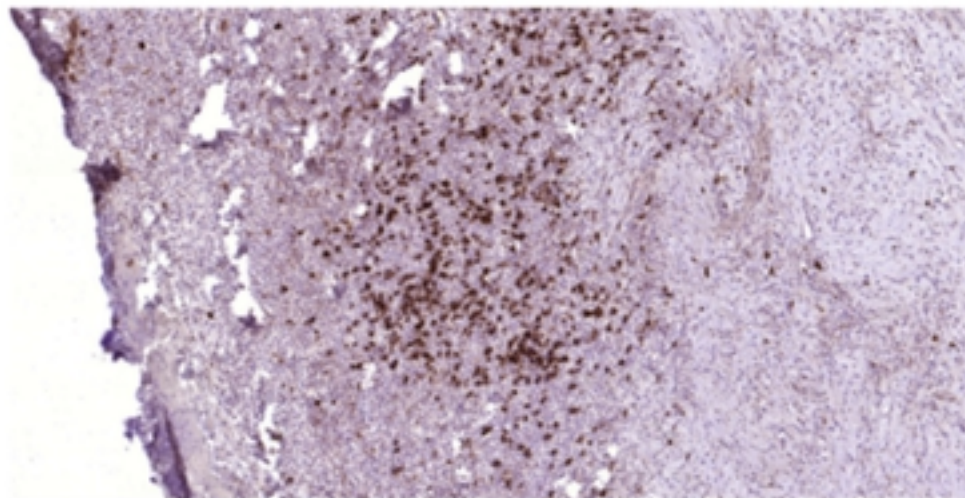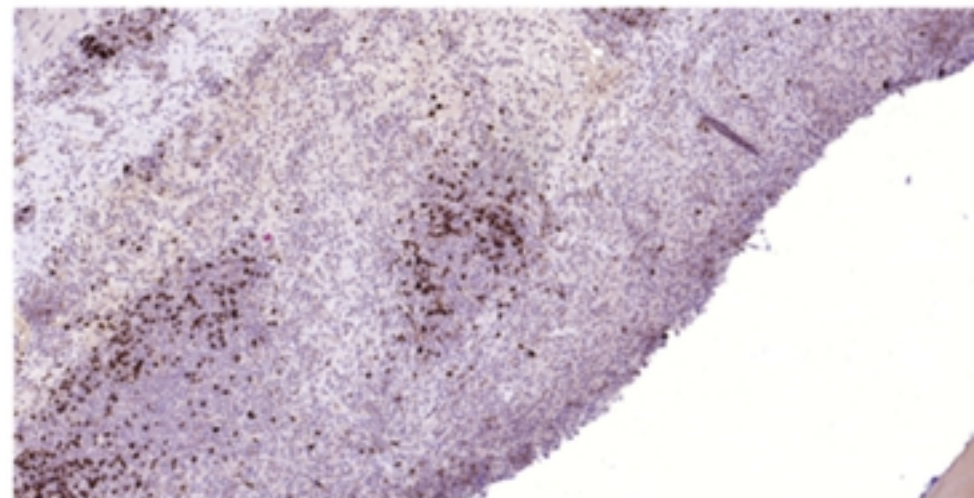

40x

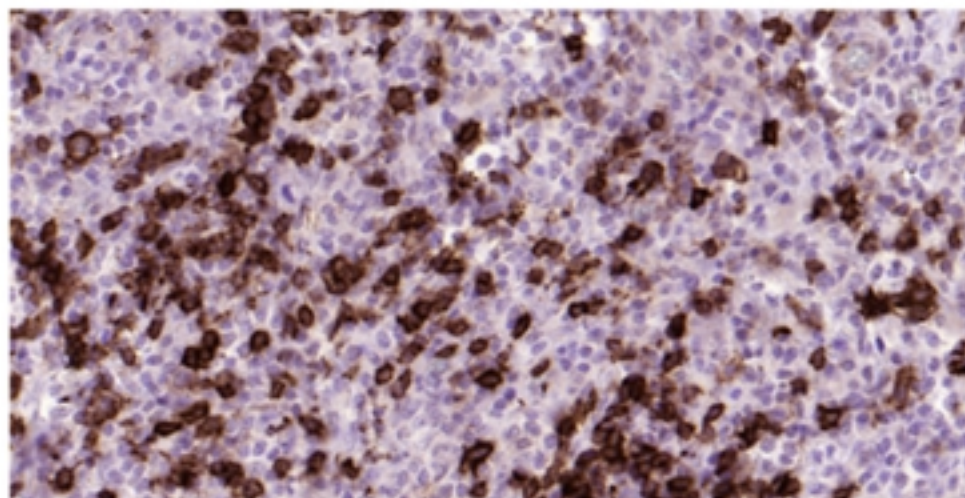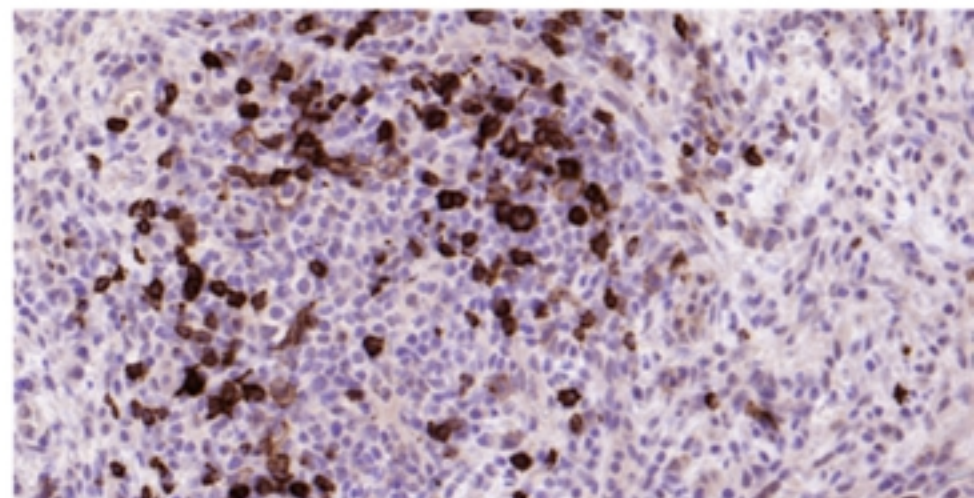

Cell

Cormatrix

Figure 5
